# Supplementary material for: Strongly coupled Ag/Cu with MXene for efficient tandem nitrate reduction reaction and zinc–nitrate batteries
Source: Royal Society of Chemistry journal article supplement (doi:10.1039/d4cy01511h), 2025-01-01
Supplement: d4cy01511h1.pdf [file d4cy01511h1.pdf]

## Support information

### **Strongly coupled Ag/Cu with MXene for efficient tandem nitrate reduction reaction and zinc-nitrate battery**

Bin Kui,<sup>†a</sup> Shuang Zhao,<sup>†a</sup> Yunhong Hu,<sup>†b</sup> Kai Zheng,<sup>a</sup> Yuanhui Yao,<sup>a</sup> Song Chen,<sup>c</sup>  
Nana Wang,<sup>d</sup> Peng Gao,<sup>\*a</sup> Zhongchao Bai,<sup>\*e</sup> and Wei Ye<sup>\*a</sup>

- a. College of Material, Chemistry and Chemical Engineering, Key Laboratory of Organosilicon Chemistry and Material Technology, Ministry of Education, Hangzhou Normal University, Hangzhou, Zhejiang, 311121, China.
- b. State Key Laboratory of Biocatalysis and Enzyme Engineering, School of Life Sciences, Hubei University, 430062, China.
- c. Kharkiv Institute, Hangzhou Normal University, Hangzhou 311121, China.
- d. Institute for Superconducting and Electronic Materials (ISEM), Innovation Campus, University of Wollongong, Squires Way, North Wollongong NSW 2500, Australia.
- e. Institute of Energy Materials Science (IEMS), University of Shanghai for Science and Technology, Shanghai 200093, China.

\*Corresponding author:

Peng Gao, E-mail: gaopeng@hznu.edu.cn.

Zhongchao Bai, E-mail: baizhongchao@tyut.edu.cn.

Wei Ye, E-mail: yewei@hznu.edu.cn.

## Experimental procedures

### Chemicals.

Silver nitrate ( $\text{AgNO}_3$ , A.R.), copper(II) chloride dihydrate ( $\text{CuCl}_2 \cdot 2\text{H}_2\text{O}$ , A.R.), sodium borohydride ( $\text{NaBH}_4$ , A.R.), sodium salicylate ( $\text{NaC}_7\text{H}_5\text{O}_3$ , A.R.), sodium citrate ( $\text{Na}_3\text{C}_6\text{H}_5\text{O}_7$ , A.R.), Monopotassium monosodium tartrate tetrahydrate ( $\text{KNaC}_4\text{H}_{12}\text{O}_{10}$ , A.R.), sodium hydroxide ( $\text{NaOH}$ , A.R.), sodium hypochlorite ( $\text{NaClO}$ , A.R.), sodium nitroprusside ( $\text{FeNa}_2\text{C}_5\text{H}_4\text{N}_6\text{O}_3$ , A.R.), ammonium chloride ( $\text{NH}_4\text{Cl}$ , A.R.), sodium nitrite ( $\text{NaNO}_2$ , A.R.), ethanol ( $\text{EtOH}$ , A.R.),  $^{15}\text{N}$ -labeled potassium nitrate ( $\text{K}_{15}\text{NO}_3$ ,  $\geq 99.5\%$ ), potassium nitrate ( $\text{KNO}_3$ , A.R.), ethylene glycol ( $\text{C}_2\text{H}_6\text{O}_2$ , A.R.), potassium hydroxide ( $\text{KOH}$ , A.R.), hydrochloric acid ( $\text{HCl}$ , A.R.), Lithium fluoride ( $\text{LiF}$ , A.R.), ultra-high purity Ar (99.999%) and Griess reagent were purchased from Sinopharm Chemical Reagent Co. Ltd. (Shanghai, China).  $\text{Ti}_3\text{AlC}_2$  (400 mesh) was purchased from 11 tech. All chemicals were used without further purification. All aqueous solutions were prepared using de-ionized (DI) water with a resistivity of  $18.25 \text{ M}\Omega \cdot \text{cm}^{-1}$ .

### Sample characterizations

Prior to electron microscopy characterizations, a drop of the suspension of nanostructures in ethanol was placed on a piece of carbon-coated copper grid and dried under ambient conditions. Transmission electron microscopy (TEM) and high-resolution TEM (HRTEM) images with the corresponding energy-dispersive X-ray spectroscopy (EDS) mapping profiles were collected on a JEOL JEM-2100F field-emission high-resolution transmission electron microscope operated at 200 kV. Powder X-ray diffraction (XRD) patterns were recorded on a Philips X'Pert Pro Super X-ray diffractometer with  $\text{Cu-K}\alpha$  radiation ( $\lambda = 1.5418 \text{ \AA}$ ). X-ray photoelectron spectra (XPS) were collected on an ESCALab 250 X-ray photoelectron spectrometer

with non-monochromatized Al-K $\alpha$  X-rays as the excitation source.

### **Determination of ammonia (NH<sub>3</sub>)**

**Indophenol assays method.** Sodium salicylate (5 g) and Seignette salt (5 g) were dissolved in NaOH solution (100 mL, 1 M) to obtain solution A. NaClO (3.5 mL, 10% ~15%) was diluted with 96.5 mL DI water to obtain solution B. Sodium nitroferricyanide (0.2 g) was dissolved in 20 mL DI water to obtain solution C. To quantify NH<sub>3</sub>, solution A, solution B, and solution C were added in turn in the diluted electrolyte solution (2 mL). After 2 h in a dark room at room temperature, its absorbance at 655 nm was acquired from the UV-Vis absorption spectrum. A series of standard NH<sub>3</sub> solutions were used to obtain the working curve for NH<sub>3</sub> determination.

**Nessler reagent method.** Typically, the diluted electrolyte solution (5 mL) was added into seignette salt solution (100 $\mu$ L, 0.2M) to wipe off the possible metal cations contamination. Commercial Nessler reagent (150 $\mu$ L) was added into the above mixture for 10min. Absorbance at 420 nm was acquired from the UV-Vis absorption spectrum. A series of standard NH<sub>3</sub> solutions were used to obtain working curve for NH<sub>3</sub> determination.

### **Determination of nitrite ions (NO<sub>2</sub><sup>-</sup>)**

The nitrite ions were spectrophotometrically quantified with Griess reagent. Typically, Griess reagent (200  $\mu$ L) was added into the electrolyte solution (5 mL). Then, the solution was heated to 100 °C and maintained at that temperature for 1 min. After it was cooled to room temperature, its UV-Vis absorption spectrum was acquired and the absorbance at 524 nm was obtained. A series of standard NO<sub>2</sub><sup>-</sup> solutions were

used to obtain the working curve for  $\text{NO}_2^-$  determination.

#### Determination of $\text{N}_2$ , $\text{H}_2$

The amounts of  $\text{H}_2$  and  $\text{N}_2$  were quantified by a gas chromatograph (GC) equipped with thermal conductivity (TCD) detector.

The FEs for  $\text{NO}_2^-$ ,  $\text{NH}_3$ ,  $\text{N}_2$ , and  $\text{H}_2$  were calculated according to Equations (2-5):

$$\text{FE}_{\text{NO}_2^-} = (2F \times C_{\text{NO}_2^-} \times V) / (47 \times Q) \quad (2)$$

$$\text{FE}_{\text{NH}_3} = (8F \times C_{\text{NH}_3} \times V) / (17 \times Q) \quad (3)$$

$$\text{FE}_{\text{N}_2} = (10F \times V/V_m) / Q \quad (4)$$

$$\text{FE}_{\text{H}_2} = (2F \times V/V_m) / Q \quad (5)$$

Where  $F$  is the Faraday constant ( $96485.3 \text{ C mol}^{-1}$ ),  $C$  is the concentration,  $V$  is the volume,  $V_m$  is standard molar volume and  $Q$  is the total charge passed through the working electrode.

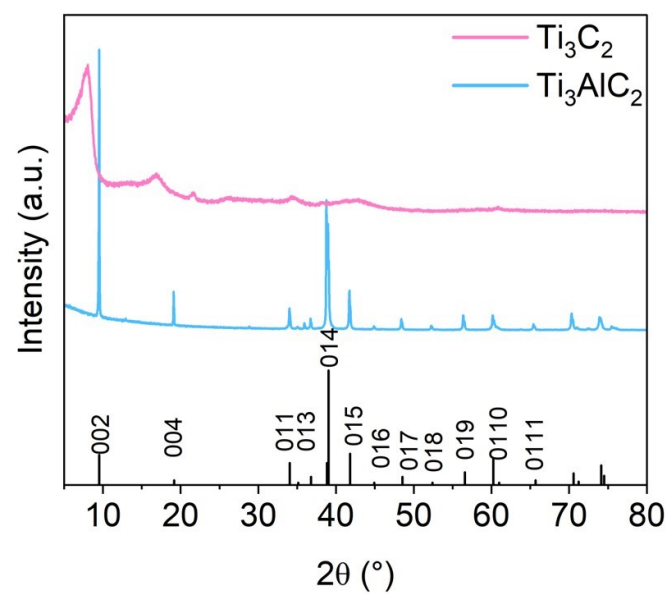

**Fig. S1.** XRD patterns of MXene and  $\text{Ti}_3\text{AlC}_2$  MAX phase.

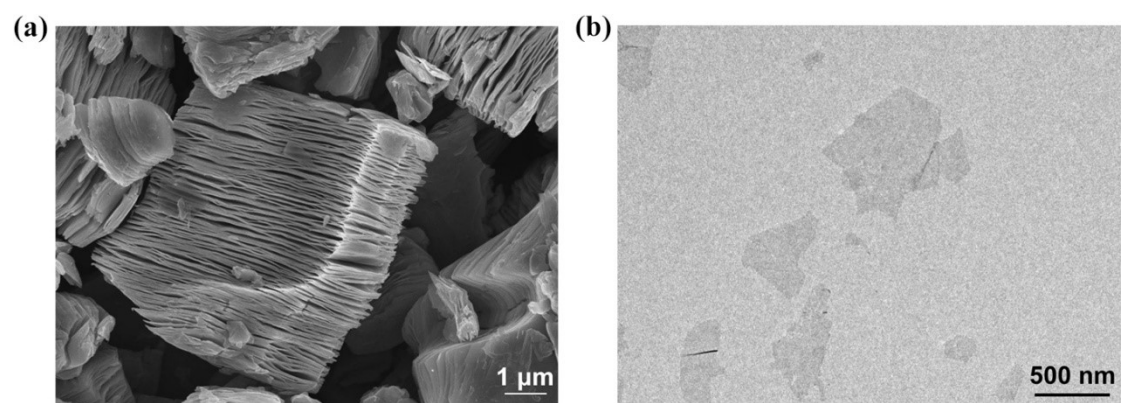

**Fig. S2.** (a) SEM image of multilayer MXene and (b) TEM image of the stripped MXene NSs.

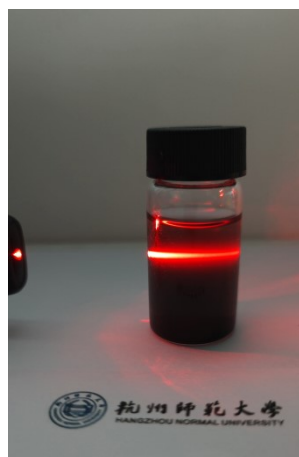

**Fig. S3.** The typical Tyndall effect of  $\text{Ti}_3\text{C}_2\text{T}_x$  NSs solution.

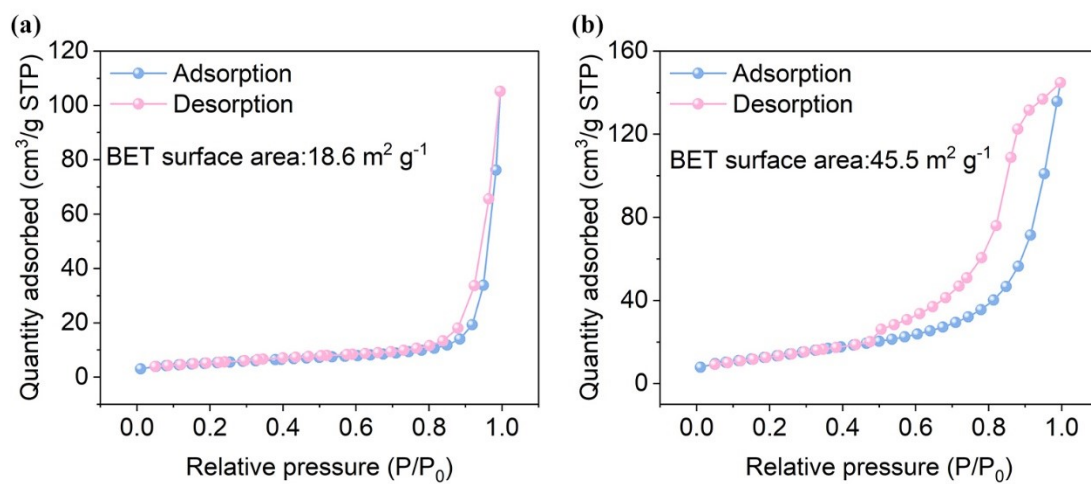

**Fig. S4.**  $N_2$  adsorption and desorption isotherms of (a) the unstripped  $\text{Ti}_3\text{C}_2\text{T}_x$  and (b) the stripped MXene.



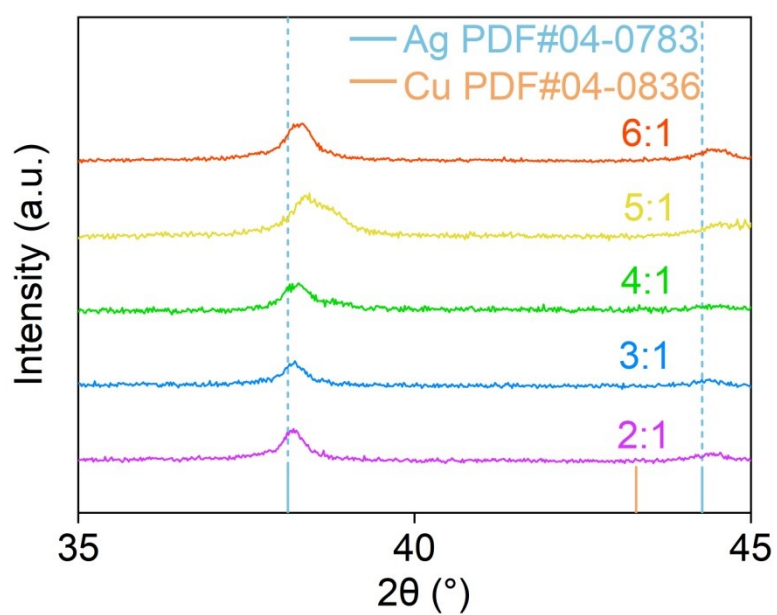

**Fig. S5.** The amplified XRD patterns of the composite samples with different Ag:Cu molar ratios.

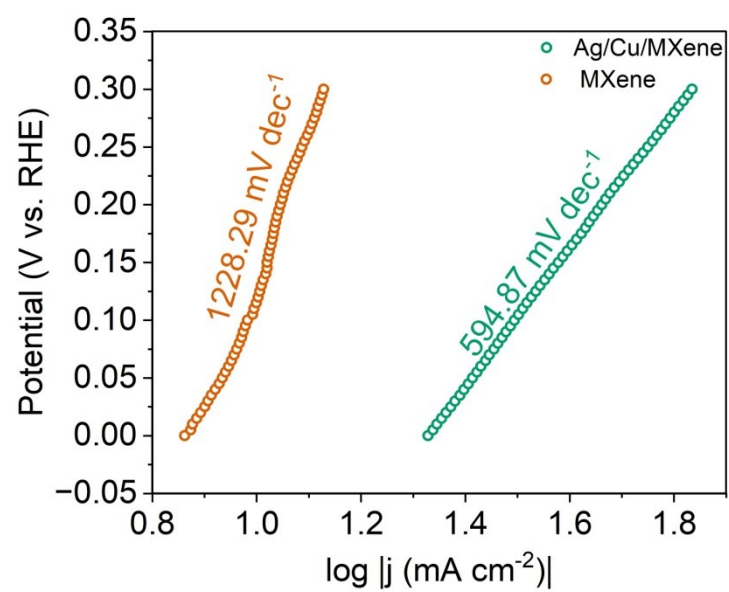

**Fig. S6.** Tafel slope of Ag/Cu/MXene and MXene samples in NO<sub>3</sub>RR.

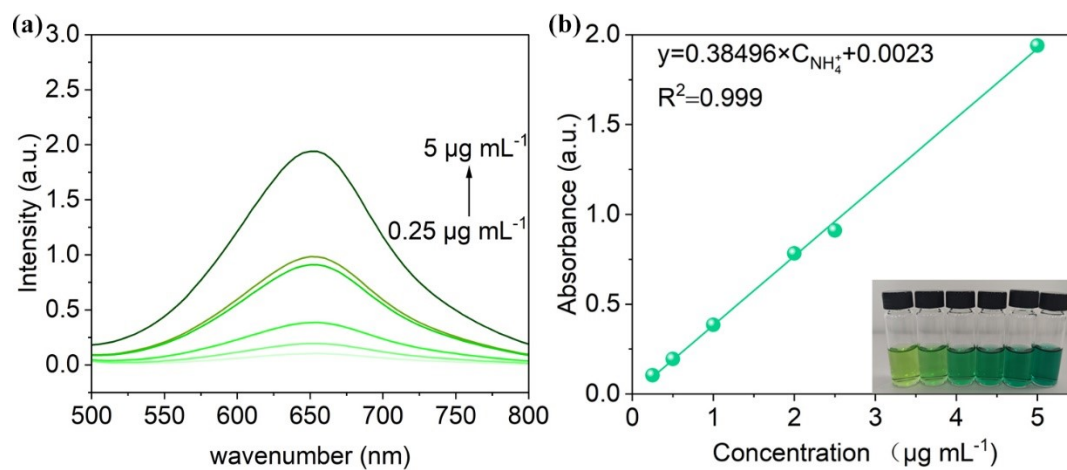

**Fig. S7.** (a) UV-Vis absorption curves of indophenol assays with different concentrations of  $\text{NH}_4^+$  and (b) calibration curve used for the estimation of  $\text{NH}_4^+$ .

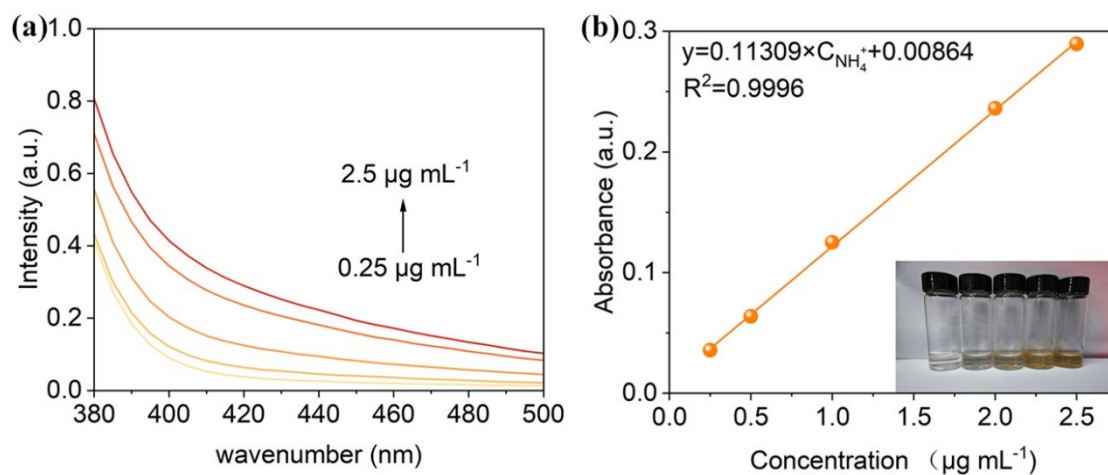

**Fig. S8.** (a) UV-Vis absorption spectra based on spectrophotometry of Nessler reagent and (b)  $\text{NH}_4^+$  concentration-absorbance curve at 420 nm with a series of standard concentrations of  $\text{NH}_4^+$  solutions.

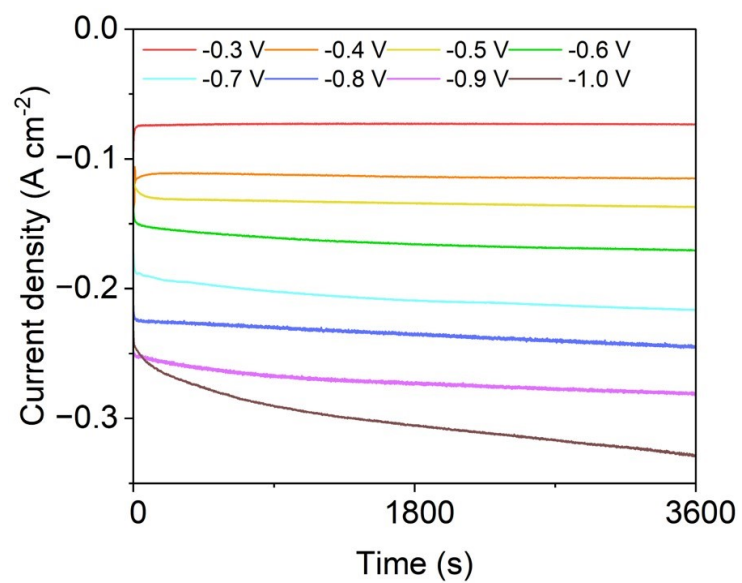

**Fig. S9.** Potential dependent  $I$ - $t$  curves of Ag/Cu/MXene composite sample in NO<sub>3</sub>RR.

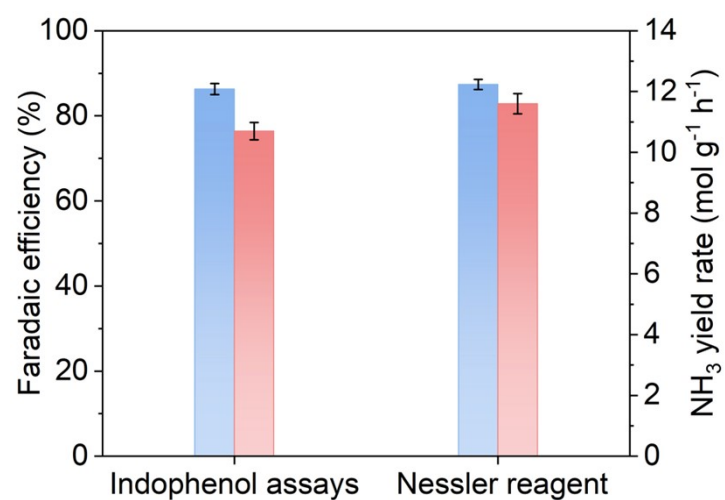

**Fig. S10.** The comparison of NH<sub>3</sub> yield rates and NH<sub>3</sub> FEs for Ag/Cu/MXene at  $-1.0$  V quantified through indophenol assays method and Nessler reagent method, respectively.

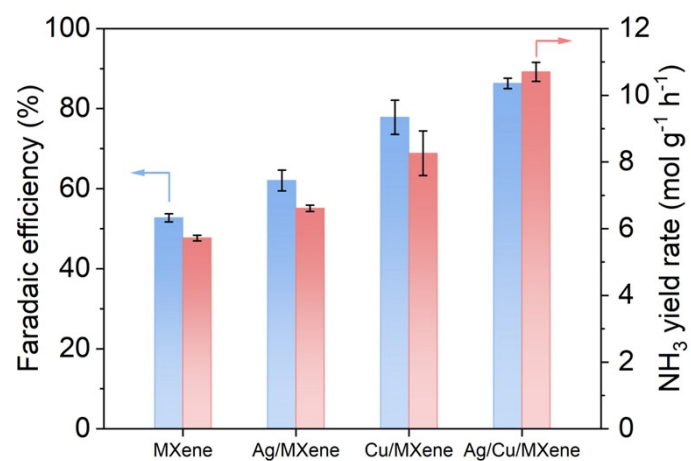

**Fig. S11.** NH<sub>3</sub> yield rates and NH<sub>3</sub> FEs of MXene, Ag/MXene, Cu/MXene and Ag/Cu/MXene at -1.0 V.

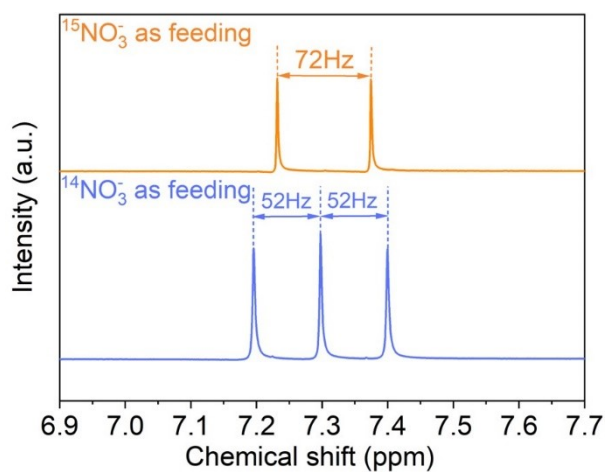

**Fig. S12.**  $^1\text{H}$ -NMR spectra of the electrolytes operated in  $^{14}\text{NO}_3^-$  or  $^{15}\text{NO}_3^-$  solutions using Ag/Cu/MXene composite sample as a catalyst.



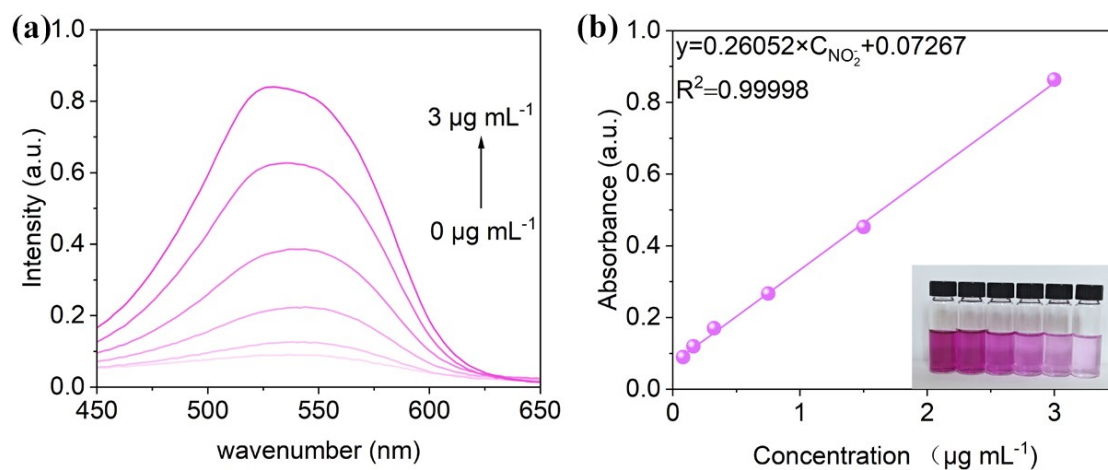

**Fig. S13.** (a) UV-Vis curves of Griess's reagent with varied concentrations of  $\text{NO}_2^-$  at 100 °C for 15 min. (b) Calibration curve used for the estimation of  $\text{NO}_2^-$ .

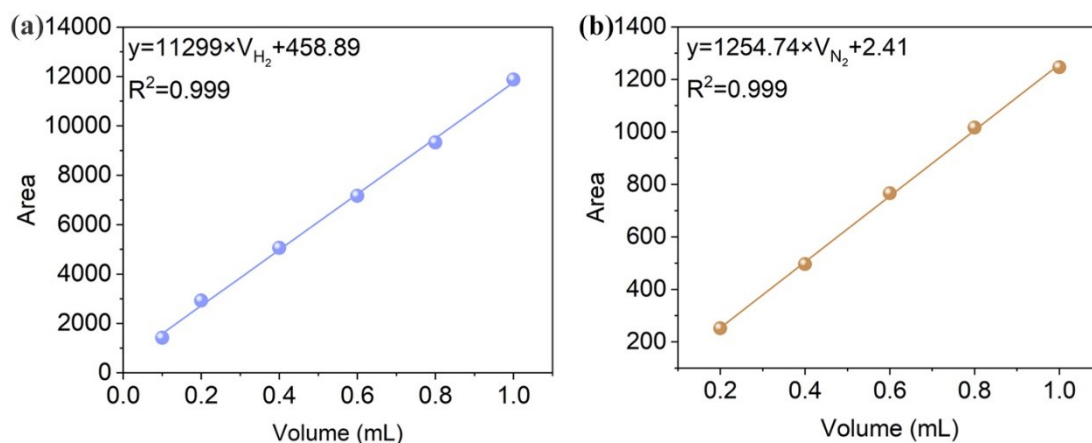

**Fig. S14.** Working curves for the estimation of (a) H<sub>2</sub> and (b) N<sub>2</sub>.

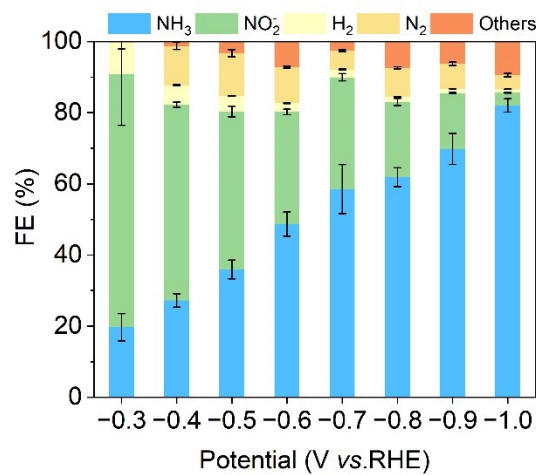

**Fig. S15.** The FEs of the possible by-products in NO<sub>3</sub>RR for Ag/Cu/MXene composite sample.

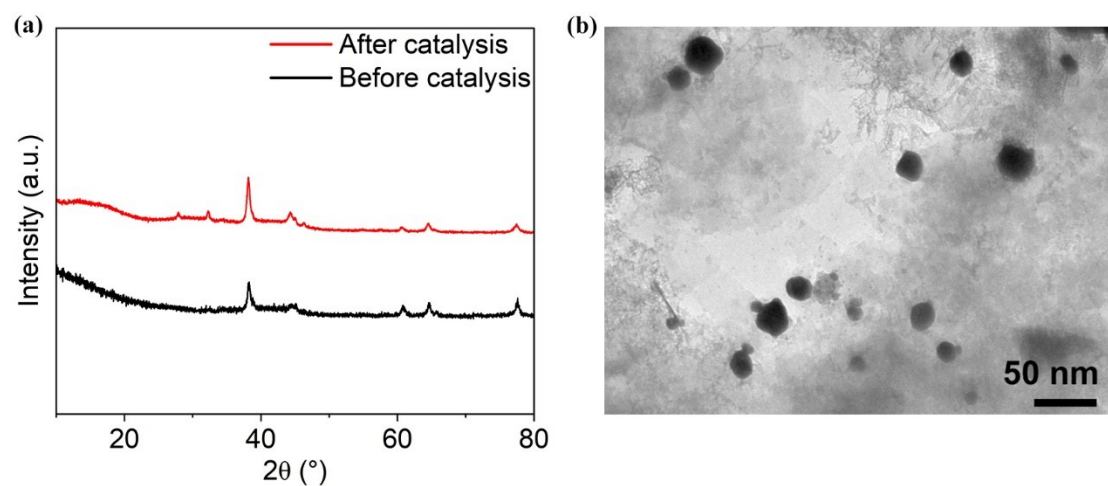

**Fig. S16.** (a) XRD patterns and (b) TEM image of Ag/Cu/MXene composite sample after catalysis.

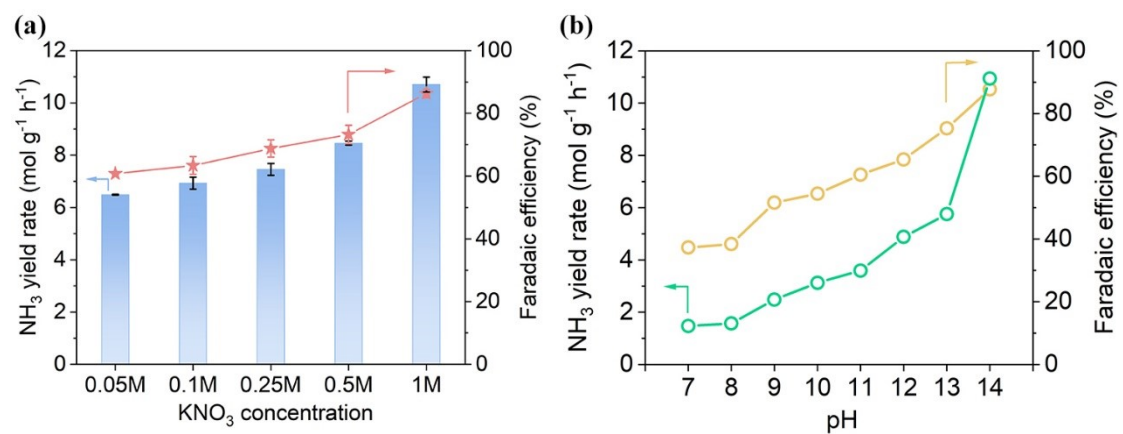

**Fig. S17.** NH<sub>3</sub> yield rates and FEs of Ag/Cu/MXene composite sample at (a) different concentrations of NO<sub>3</sub><sup>-</sup> and (b) pH.

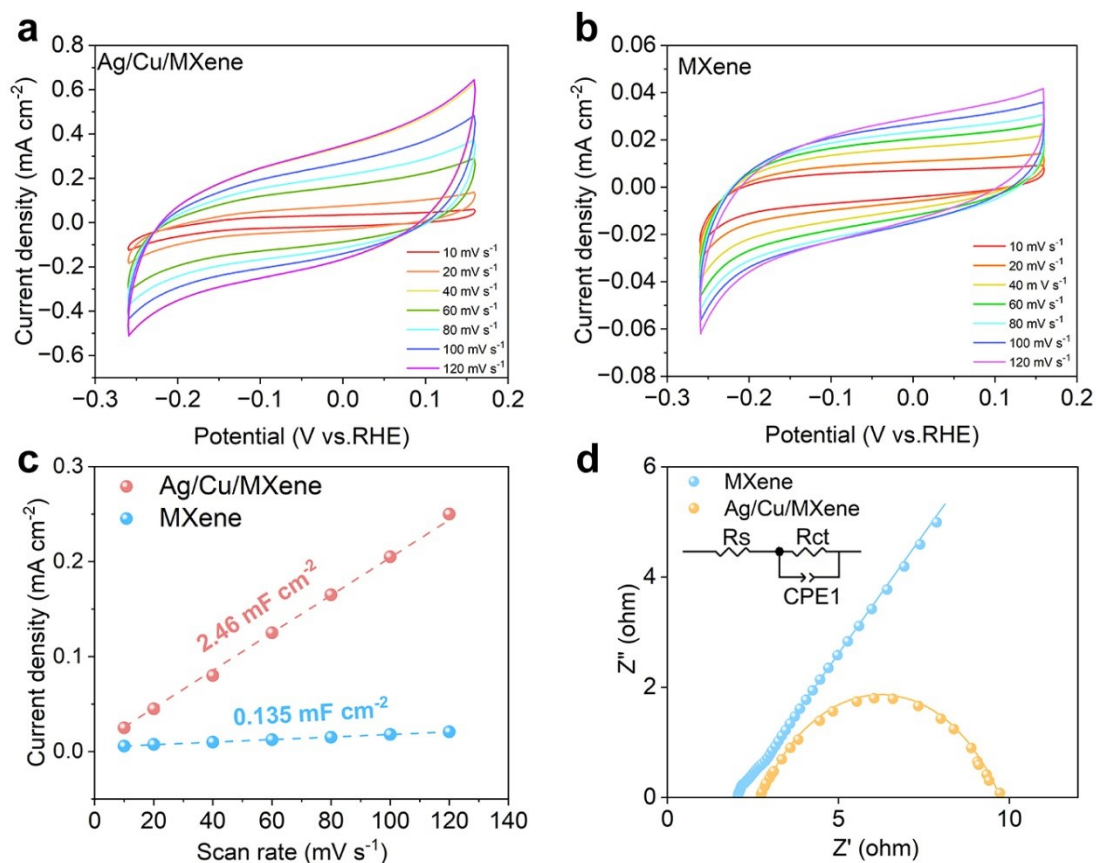

**Fig. S18.** Cyclic voltammetry curves were recorded at different scanning rates: (a) Ag/Cu/MXene composite sample and (b) MXene. (c) The curve of current density versus scan rates. (d) EIS plots of Ag/Cu/MXene composite sample and MXene.

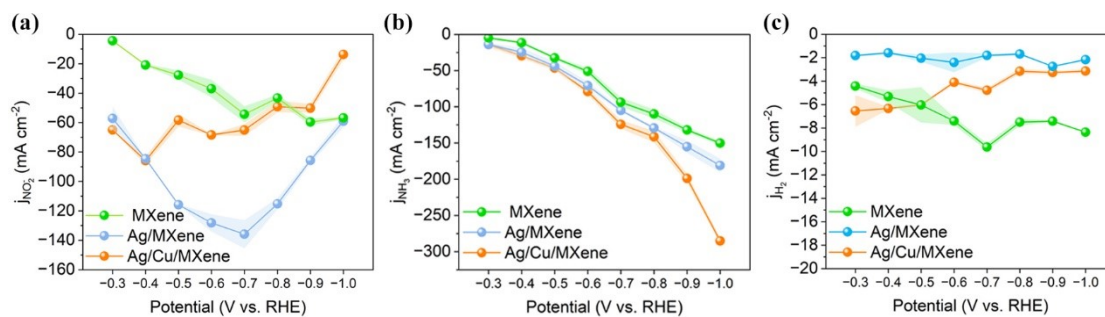

**Fig. S19.** Partial current densities of Ag/Cu/MXene, Ag/MXene and MXene at different potentials for (a)  $\text{NO}_2^-$ , (b)  $\text{NH}_3$ , (c)  $\text{H}_2$ .

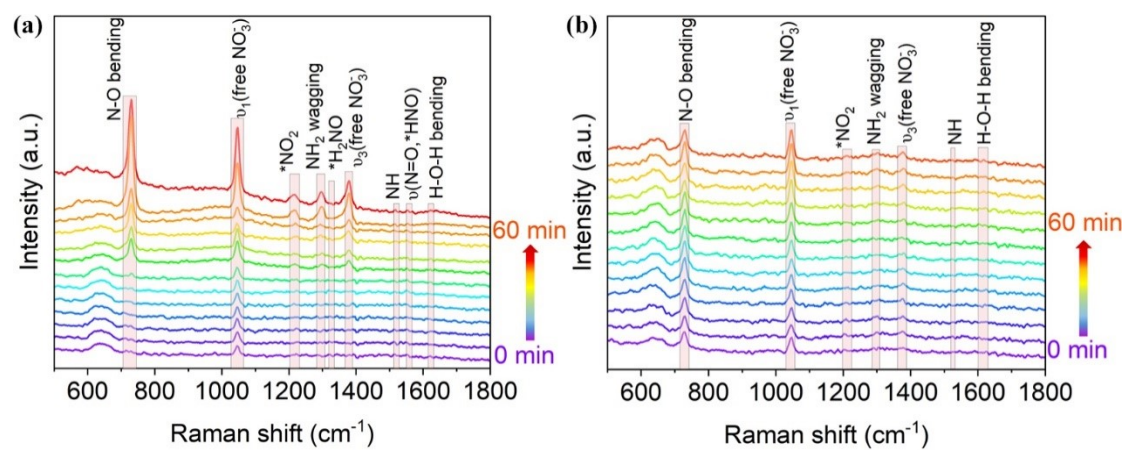

**Fig. S20.** Time-resolved in situ Raman spectra of (a) Ag/Cu/MXene and (b) MXene.



**Table S1.** Performance comparison of the Ag/Cu/MXene sample with those recently reported electrocatalysts in NO<sub>3</sub>RR.

| Catalyst                               | Electrolyte                                                              | NH <sub>3</sub> yield rate                                       | <i>J</i> (mA cm <sup>-2</sup> ) | FE (%)      | Ref.                                                                   |
|----------------------------------------|--------------------------------------------------------------------------|------------------------------------------------------------------|---------------------------------|-------------|------------------------------------------------------------------------|
| Ru-Co<br>CHNWS                         | 1 M NaOH + 1<br>M NaNO <sub>3</sub>                                      | 8.21 mg cm <sup>-1</sup><br>h <sup>-1</sup>                      |                                 | 99          | <i>Chem. Eng. J.</i><br><b>2024</b> , 490, 151883.                     |
| Ru-POC                                 | 1 M KNO <sub>3</sub>                                                     | 11.2 mg cm <sup>-1</sup><br>h <sup>-1</sup>                      | ~140                            | 96          | <i>CCS Chem.</i> <b>2022</b> ,<br>4, 3455-3462.                        |
| pCuO-10                                | 0.05M KNO <sub>3</sub> +<br>0.05M H <sub>2</sub> SO <sub>4</sub>         | ~0.200 mmol<br>h <sup>-1</sup> cm <sup>-2</sup>                  | ~150                            | ~89         | <i>Energy Environ.</i><br><i>Sci.</i> <b>2021</b> , 14,<br>3588-3598.  |
| Co <sub>3</sub> D<br>nanoarray         | 1 M KOH + 2<br>M KNO <sub>3</sub>                                        | 68.4 mg h <sup>-1</sup><br>cm <sup>-2</sup>                      | 1000                            | 86.2        | <i>Nat. Commun.</i><br><b>2023</b> , 14, 1619.                         |
| ISAA In-Pd                             | 0.5 M Na <sub>2</sub> SO <sub>4</sub><br>+ 0.1 M<br>NaNO <sub>3</sub>    | 28.06 mg h <sup>-1</sup><br>mg <sub>pd</sub> <sup>-1</sup>       | 800                             | 87.2        | <i>J. Am. Chem. Soc.</i><br><b>2023</b> , 145, 13957-<br>13967.        |
| PdCu-H                                 | 0.1 M KOH<br>+ 0.01 M<br>KNO <sub>3</sub>                                | 9.36 mg h <sup>-1</sup><br>mg <sub>cat.</sub> <sup>-1</sup>      |                                 | 87.3        | <i>Small</i> <b>2023</b> , 19,<br>2300794                              |
| Plasma<br>treated<br>Cu <sub>2</sub> O | 50ppm NaNO <sub>3</sub> -<br>N, 0.5 M<br>Na <sub>2</sub> SO <sub>4</sub> | 0.0825 mmol<br>h <sup>-1</sup> mg <sup>-1</sup>                  | 30                              | 89.54       | <i>Appl. Catal. B</i><br><i>Environ.</i> <b>2022</b> , 305,<br>121021. |
| Rh@Cu-<br>0.6%                         | 0.1 M Na <sub>2</sub> SO <sub>4</sub><br>+ 0.1 M<br>NaNO <sub>3</sub>    | 21.59 mg h <sup>-1</sup><br>cm <sup>-2</sup>                     |                                 | 93          | <i>Angew. Chem. Int.</i><br><i>Ed.</i> <b>2022</b> , 61,<br>202202556. |
| <b>Ag/Cu/MXene</b>                     | <b>1 M KOH + 1<br/>M KNO<sub>3</sub></b>                                 | <b>10.3 mol g<sub>cat.</sub><sup>-1</sup><br/>h<sup>-1</sup></b> | <b>320</b>                      | <b>87.7</b> | <b>This Work</b>                                                       |
